# Supplementary material
Source: Springer Nature journal article supplement (https://www.springermedizin.de/resource/supplementary/12935_2010_261_MOESM8_ESM.pdf/9540170)

MCF-10A  
+HC/+EGF

Chronic HC/EGF depletion

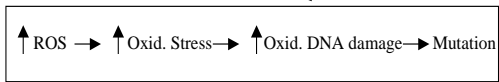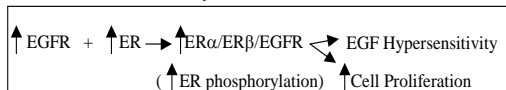

(↑Oxidative DNA Damage)

+

(↑Cell Proliferation)

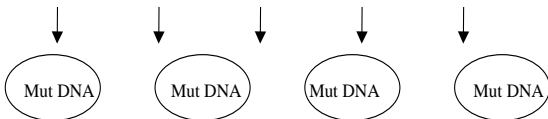

### Cell Transformation

(Enhanced Replication of Clones with DNA Mutations)

Chronic E2 exposure

EGF exposure

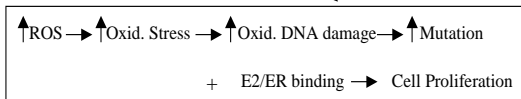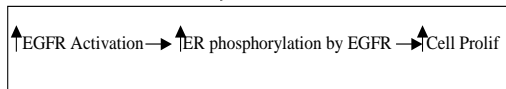

(↑↑Oxidative DNA Damage)

+

(↑↑Cell Proliferation)

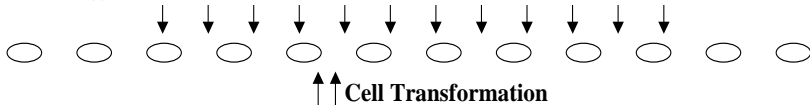

Supplement: MOESM8 [file 9540170]
